# Supplementary material for: On age-specific mortality trends since Covid-19 in Switzerland
Source: Research Square preprint supplement (doi:10.21203/rs.3.rs-7327617/v1), 2025-08-18
Supplement: Supplementary file 2 [file 7d5ded29ca07847d03f99e98.docx]

**Additional file 1**

We applied a Poisson model (logarithmic link) on the number of deaths by age () and year () with an *offset* for the corresponding population size :

In (1) is the age effect on the log-mortality rate, which is modelled using natural splines, is a linear period (year) effect depending on age (also defined via splines), and is an age-independent quadratic period effect. Model-estimated age-specific mortality rate for year is thus the following:

where , , and are estimated effects in (1). Estimates (2) were extended until year and used to estimate/predict the SMR in a given age interval (for example with to get the overall SMR):

where is a reference population, the size of this population at age , and the size in the age interval . Model (1) is estimated separately for men and women.

To define a 95% prediction interval for , let be the variance of the log-mortality rates estimated under model (1) and given by the software. Using the delta method, we obtain the variance of rates due to uncertainty in the parameter estimates, , to which we add the inherent Poisson variability at the estimated model parameters, . This gives the following:

Using delta method a second time, we obtain an estimate of the variance of log-SMR in age interval :

And finally, a 95% prediction interval for the SMR in the same age interval is given by:
