# Supplementary figures and images for: On age-specific mortality trends since Covid-19 in Switzerland
Source: Research Square preprint supplement (doi:10.21203/rs.3.rs-7327617/v1), 2025-08-18

**Additional file 2**


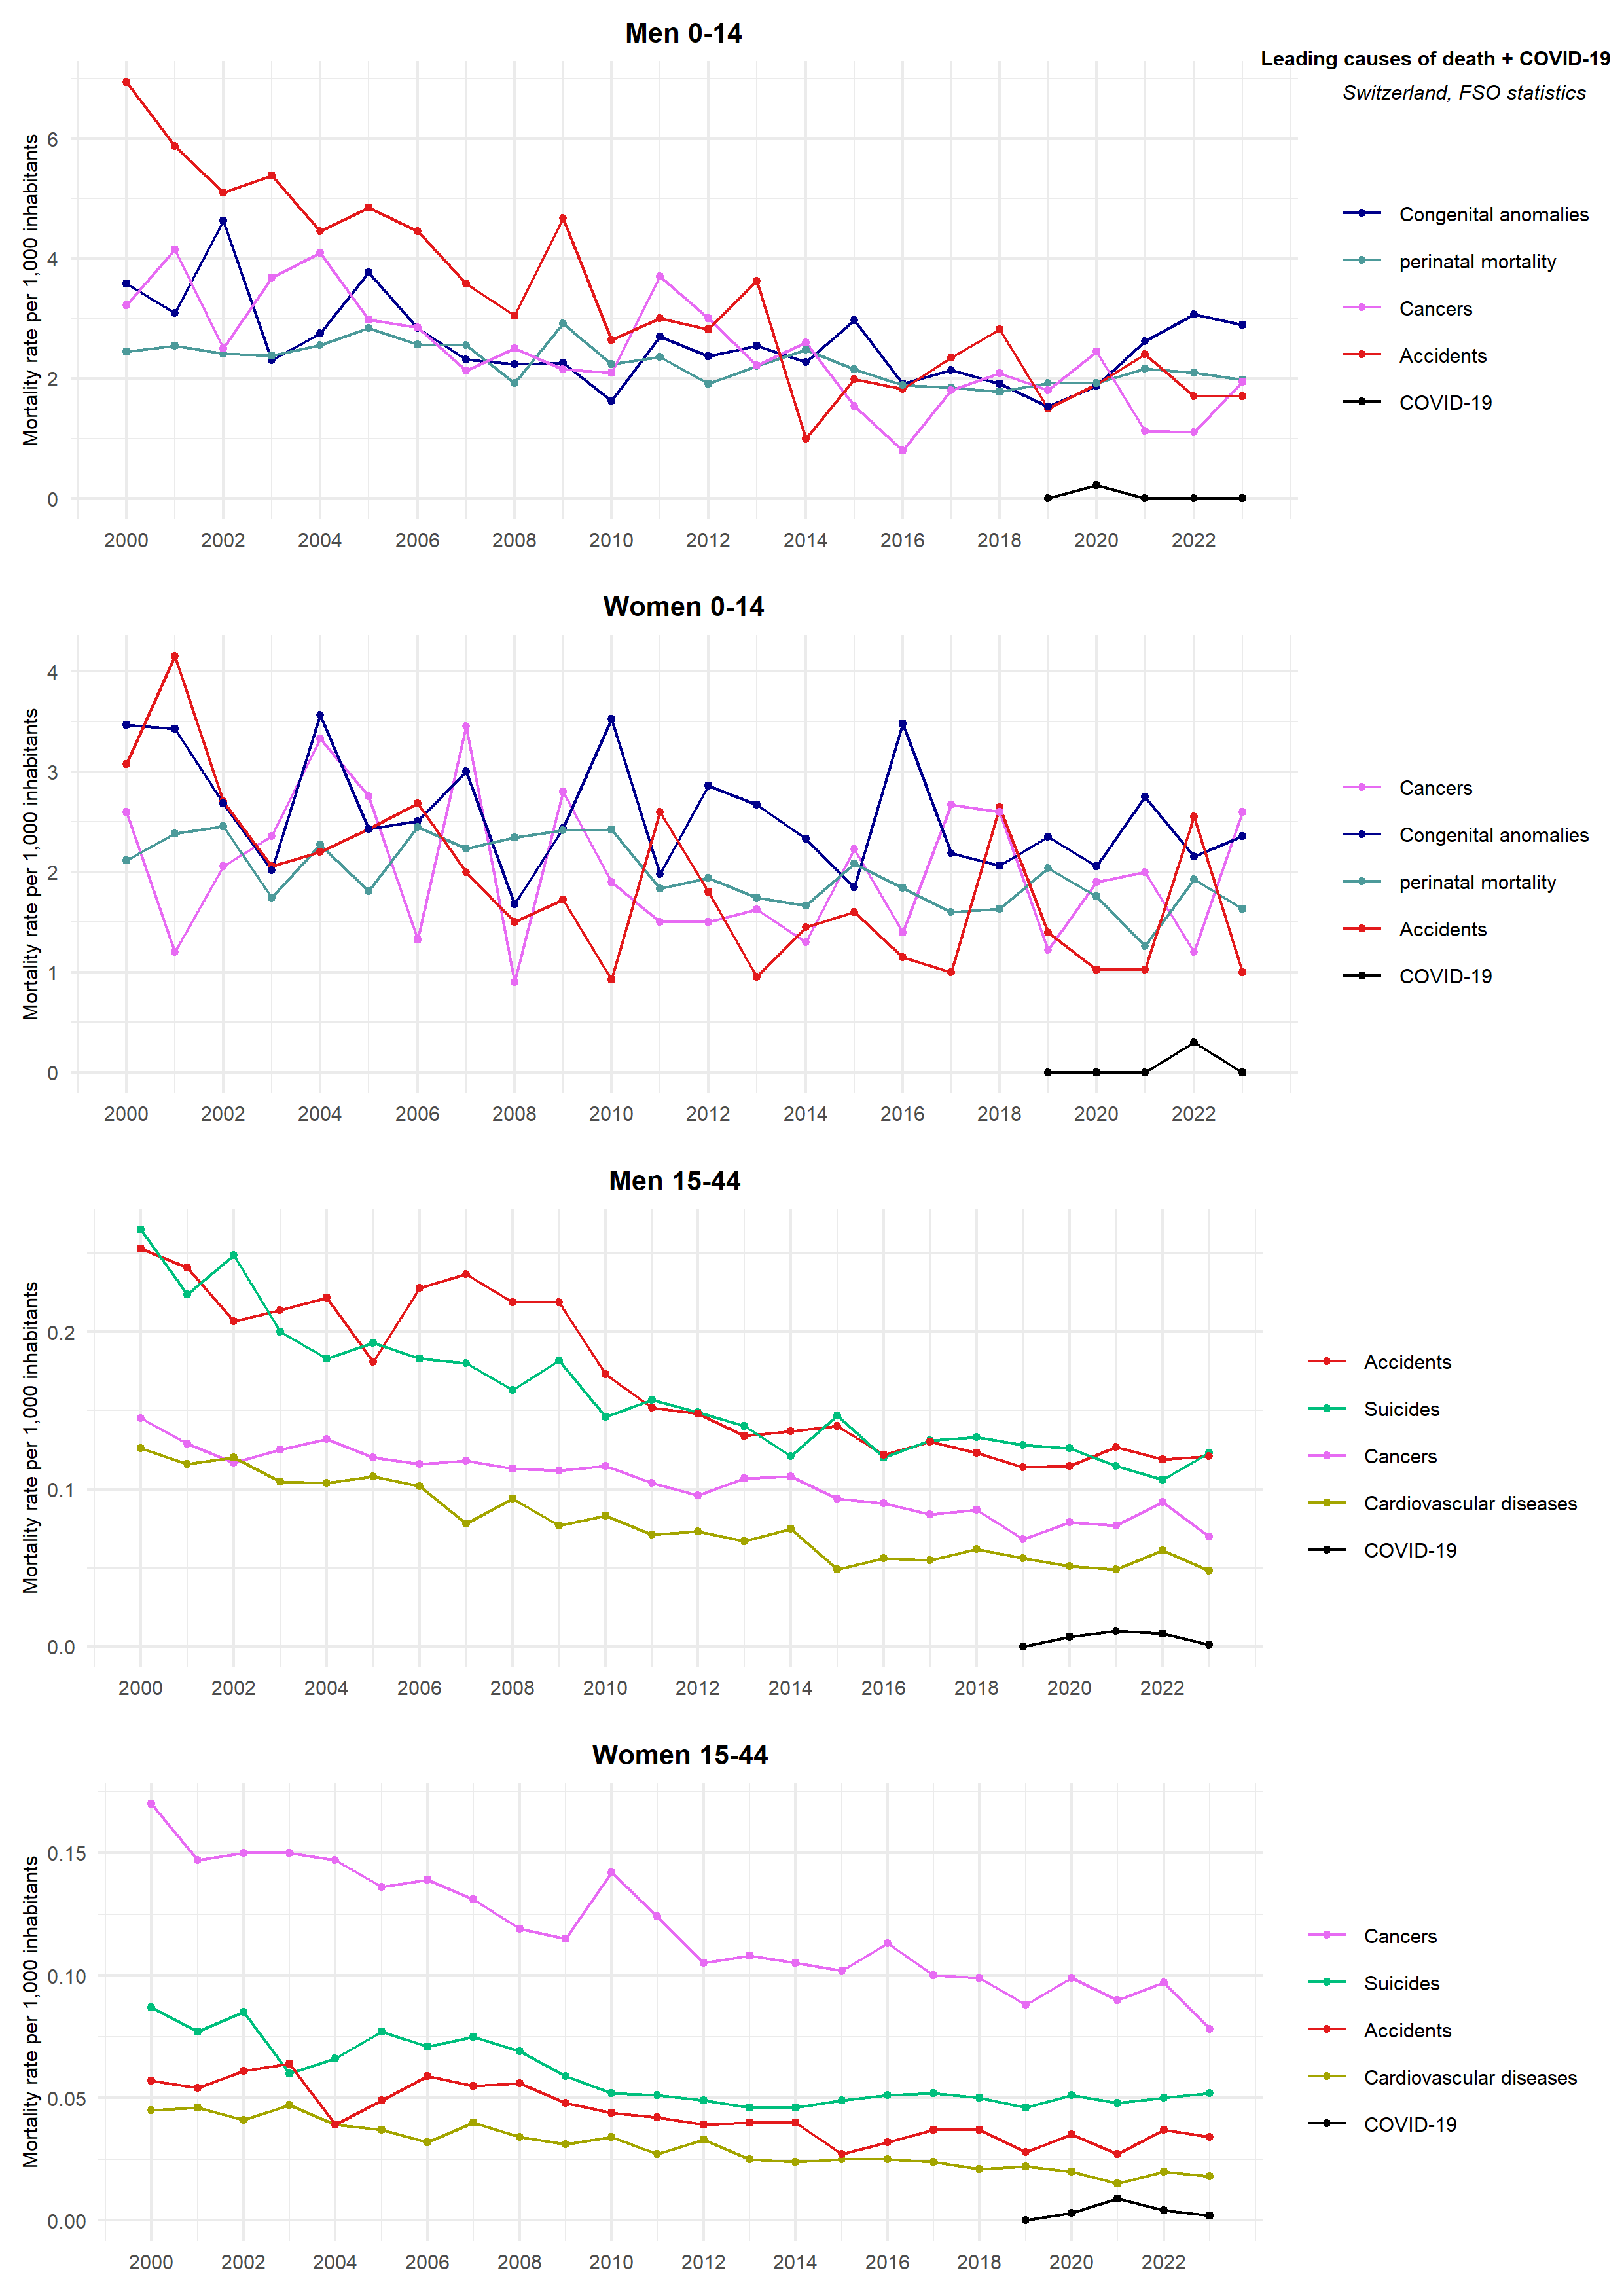


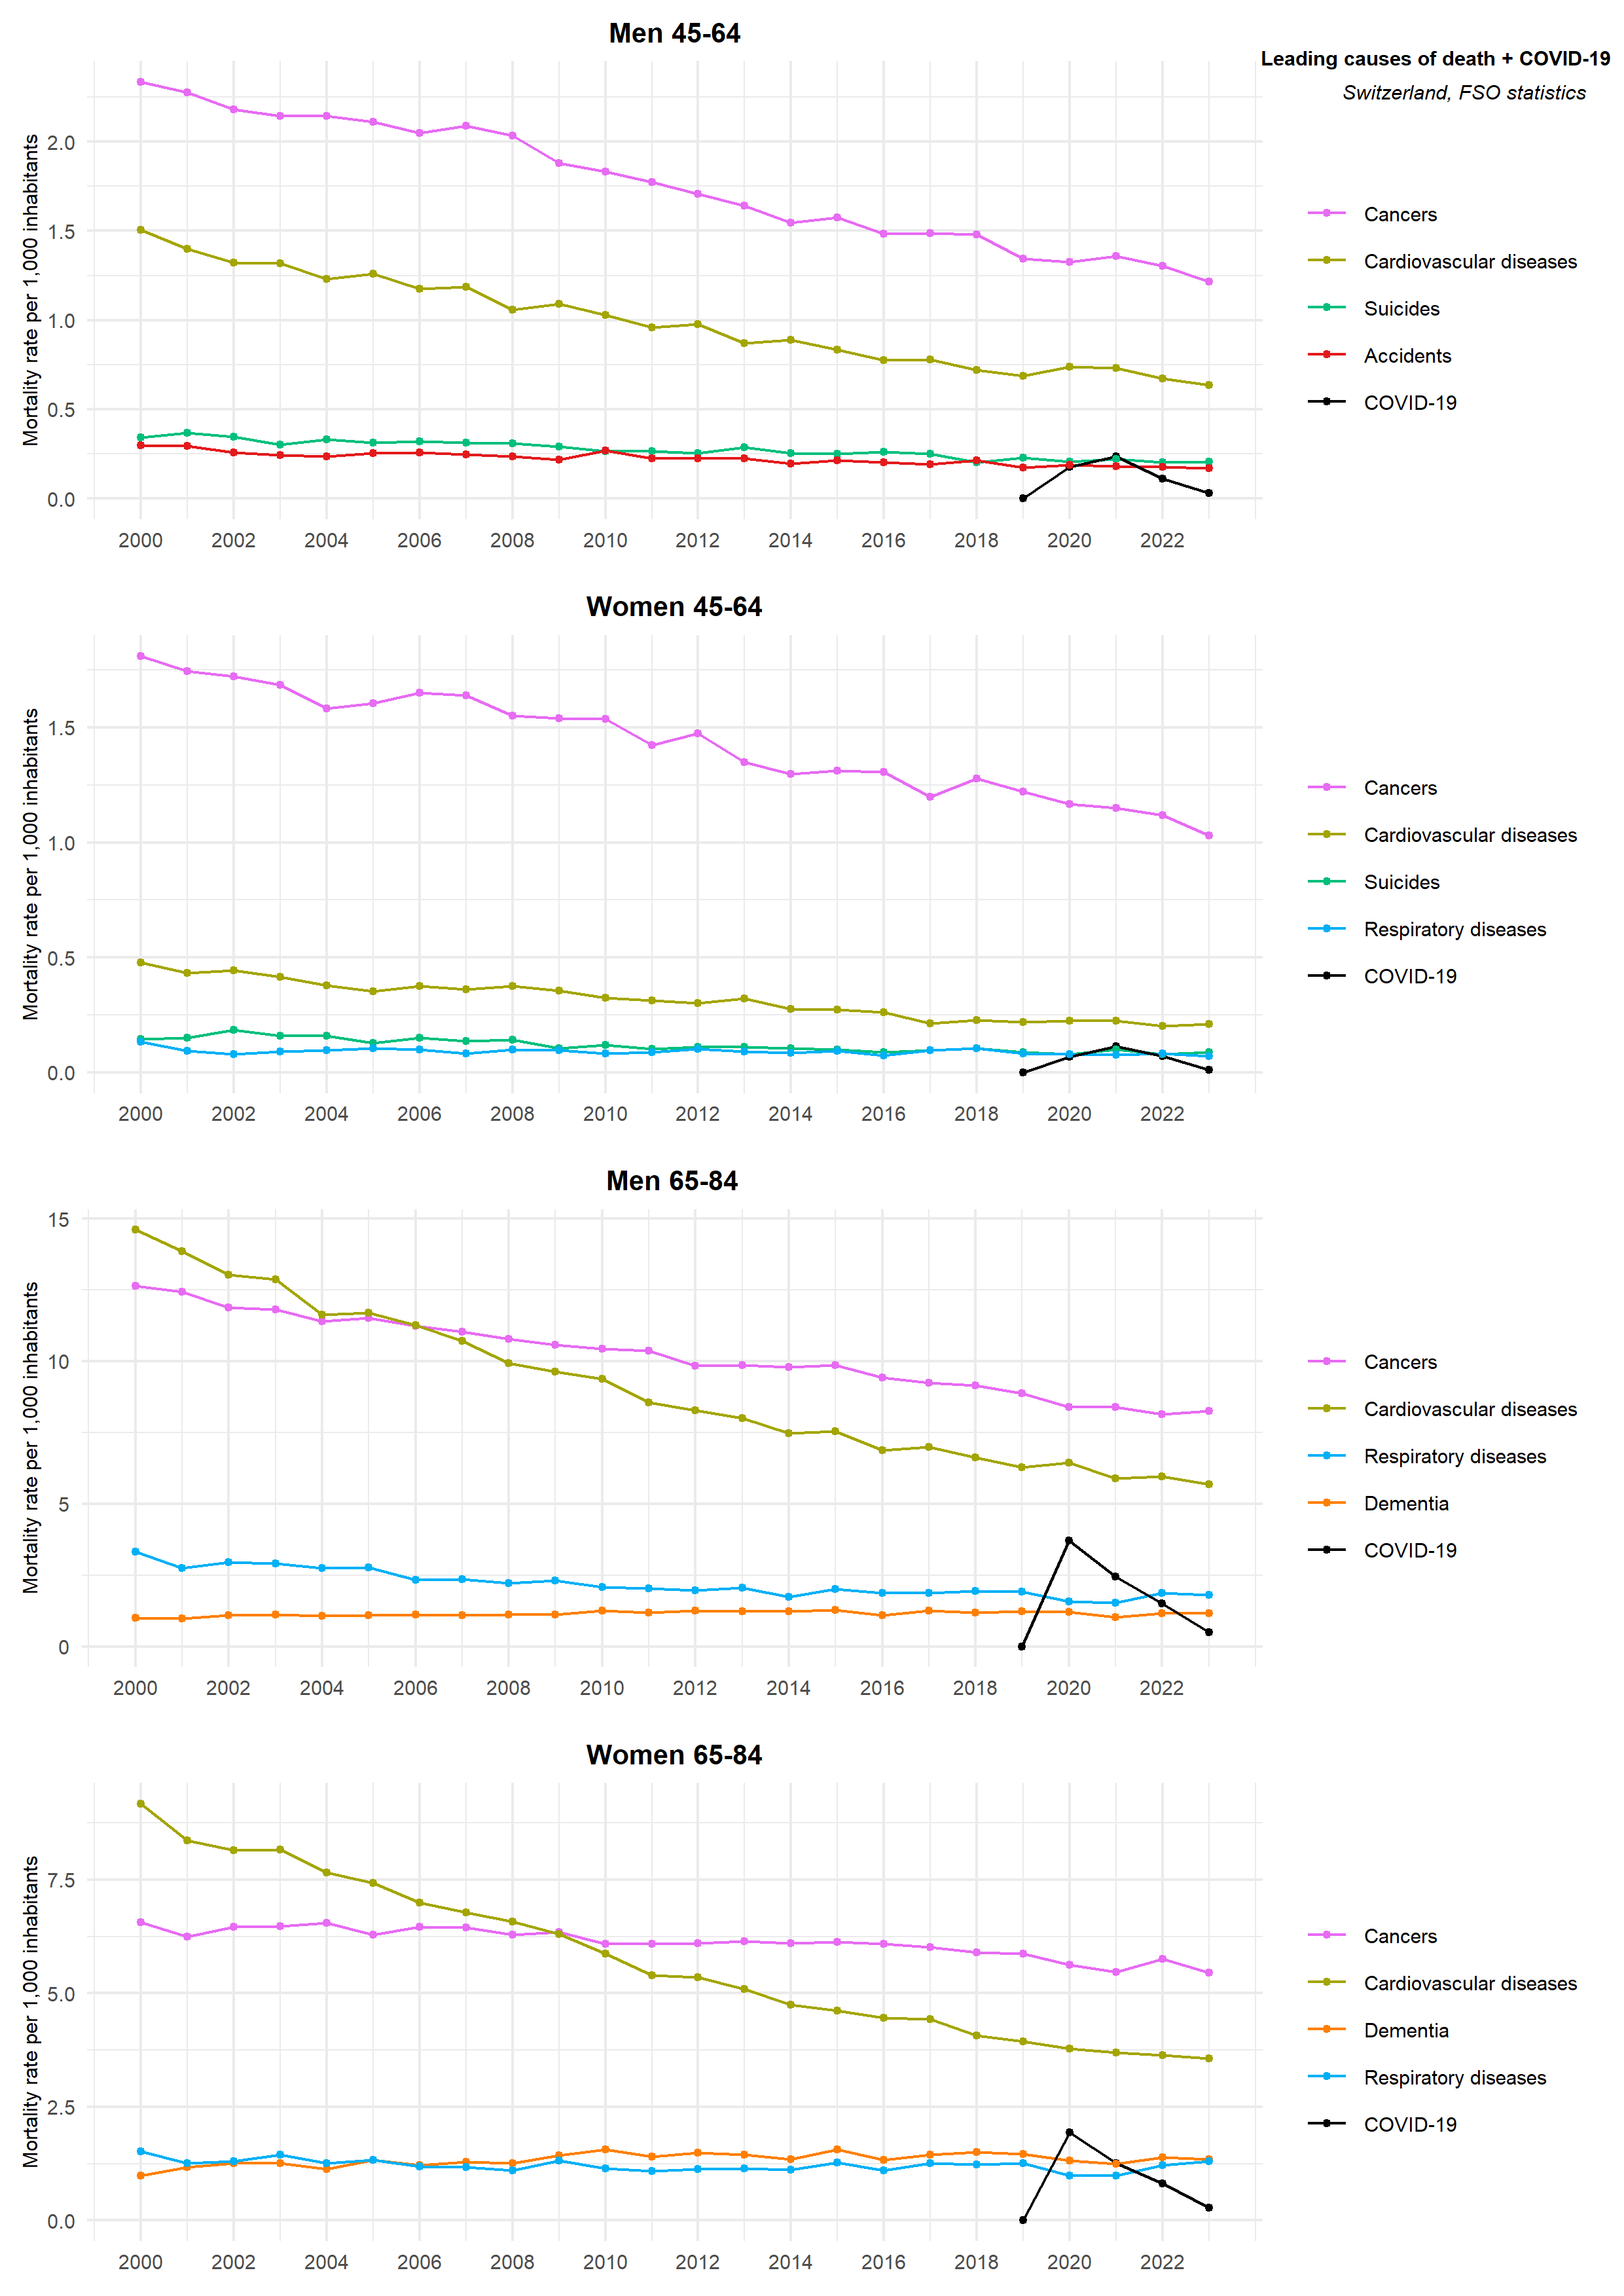


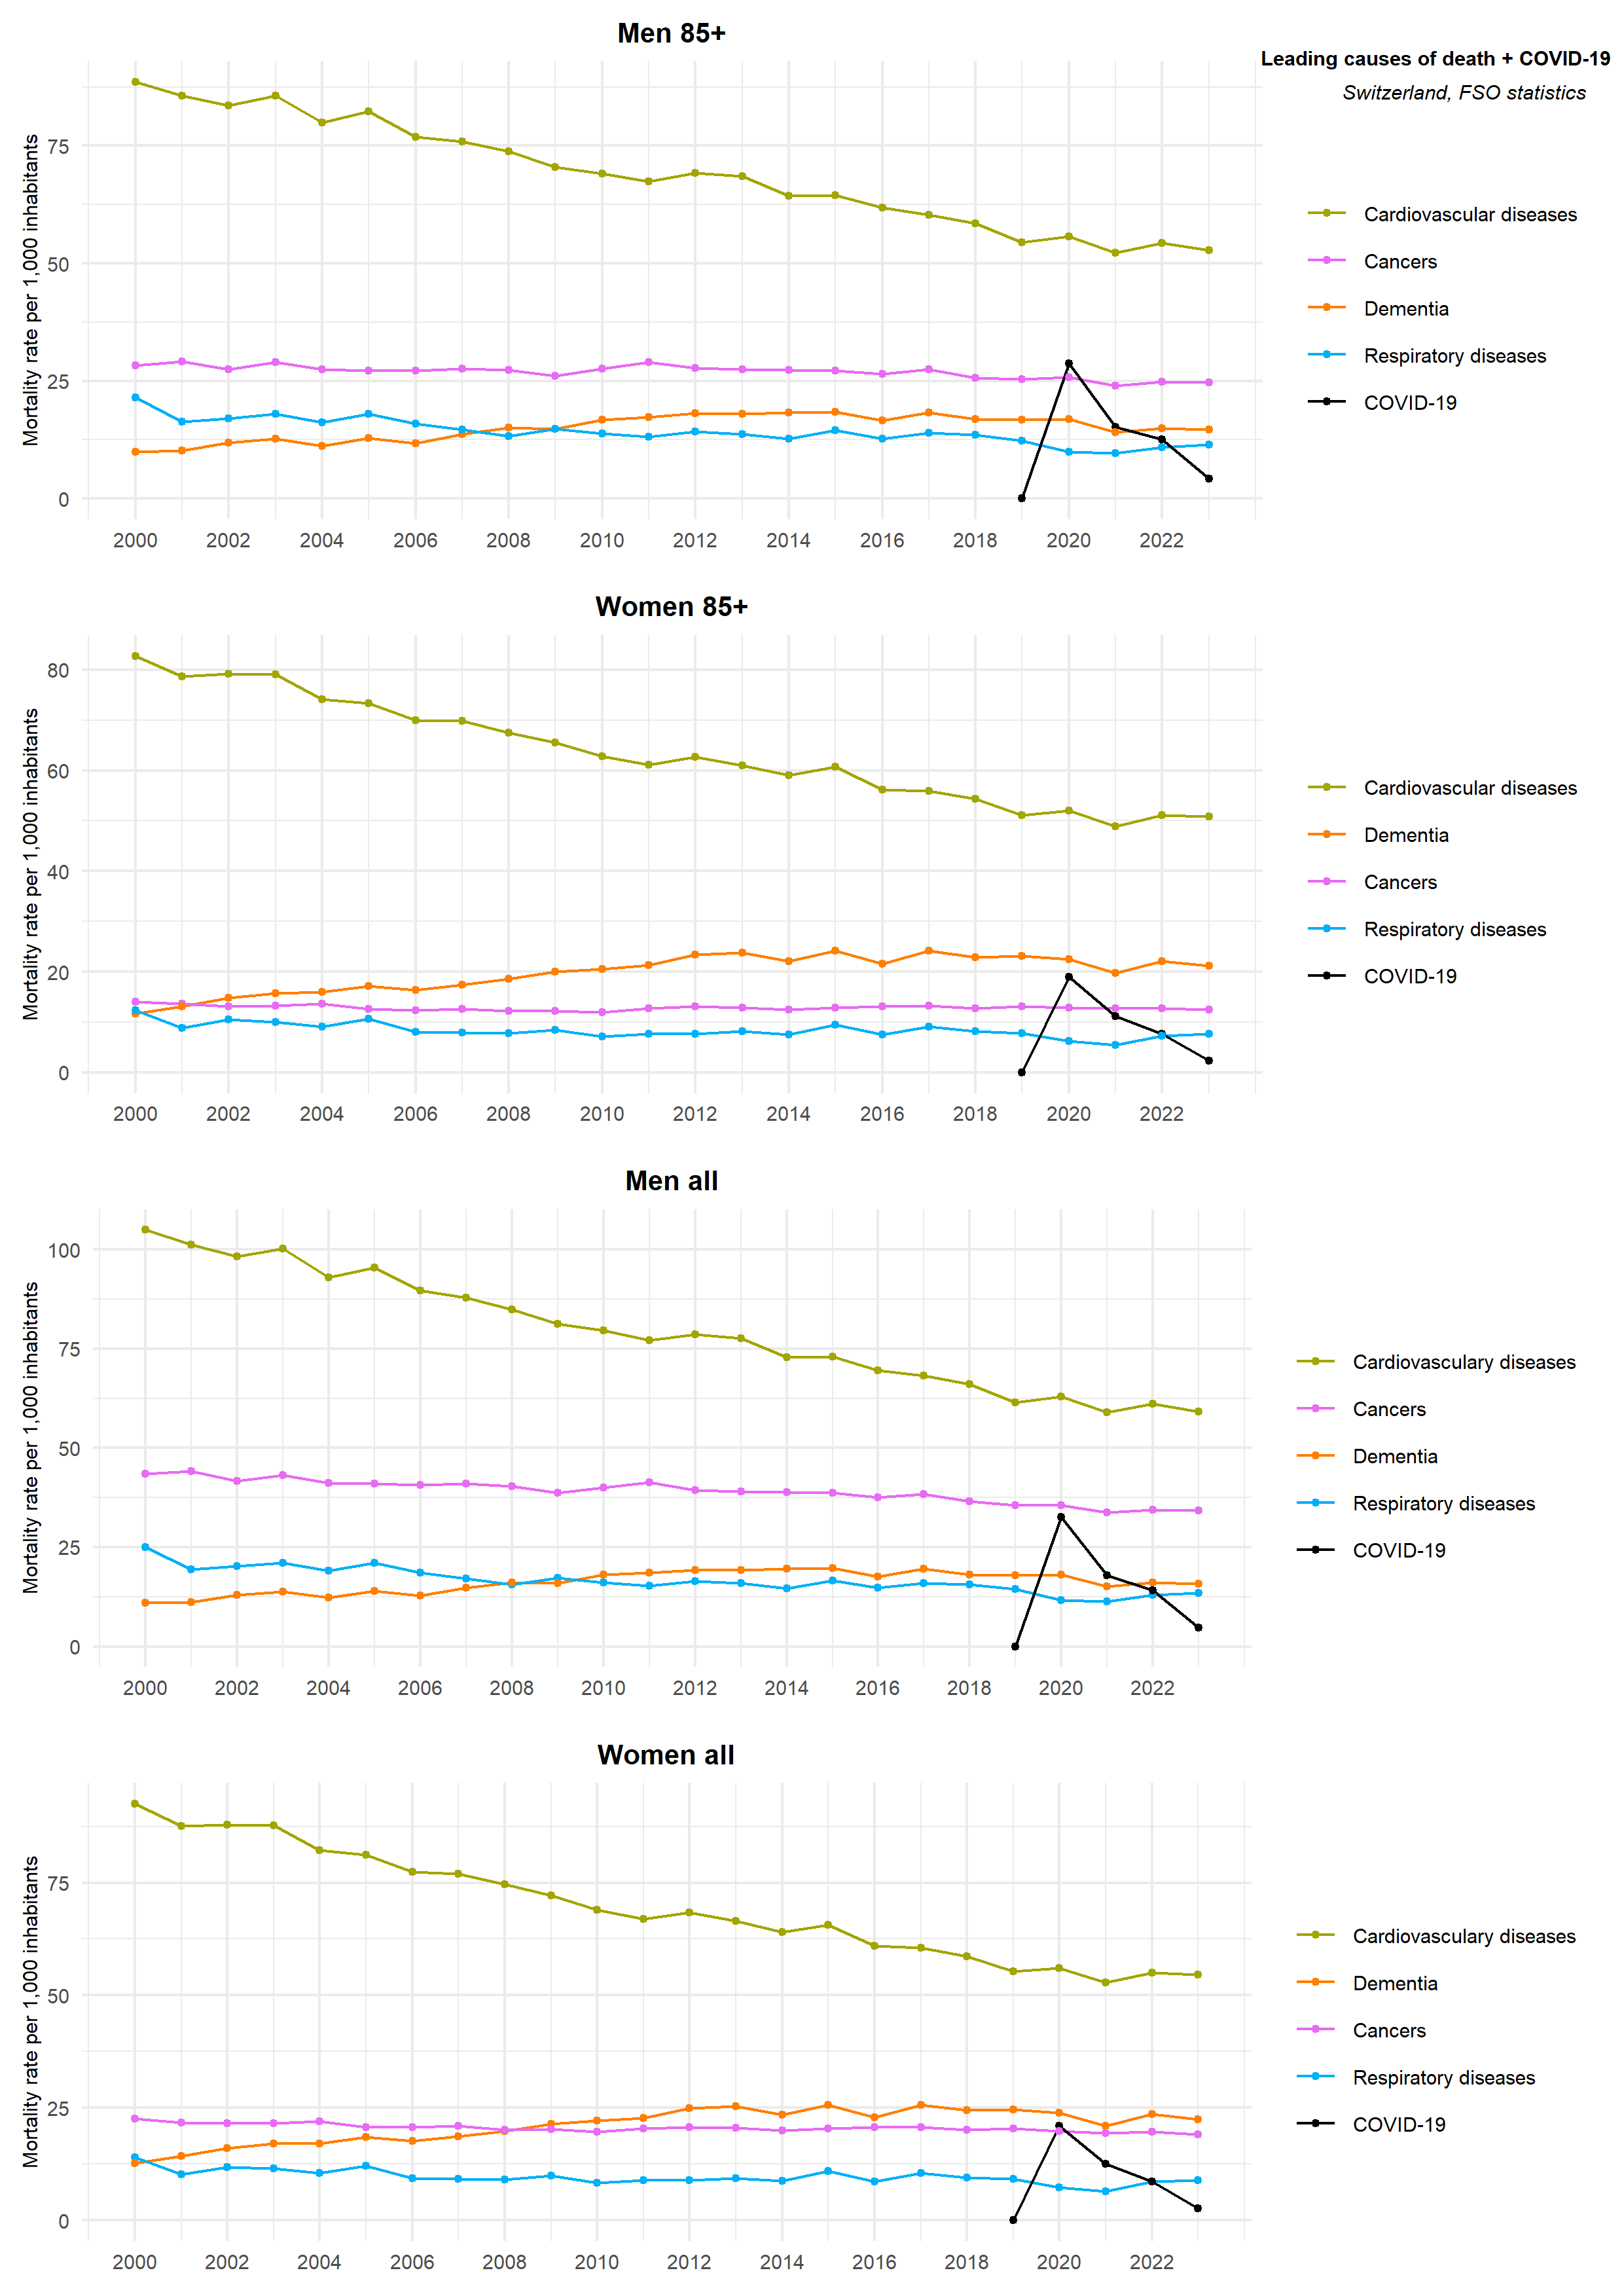

Supplement: Supplementary file 1 [file 25d0c8df23722c46b9846c88.docx]
